# Supplementary material for: Metrnl ameliorates diabetic cardiomyopathy via inactivation of cGAS/STING signaling dependent on LKB1/AMPK/ULK1-mediated autophagy
Source: PubMed Central journal article supplement — J Adv Res. 2022 Nov 9;51:161–79. doi: 10.1016/j.jare.2022.10.014 (PMC10491969; doi:10.1016/j.jare.2022.10.014), 2022-11-09

**Fig.1I**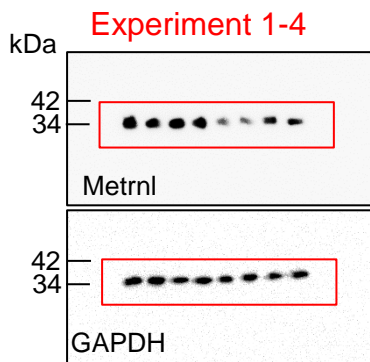**Fig.1K**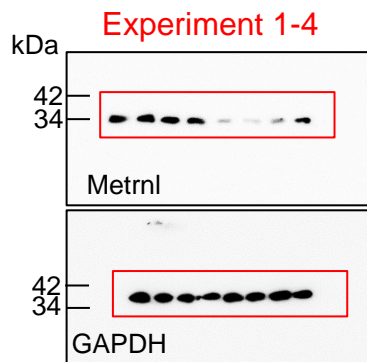**Fig.1M**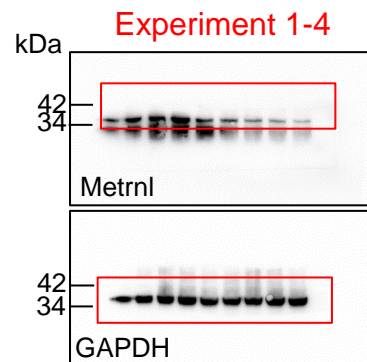**Fig.5A**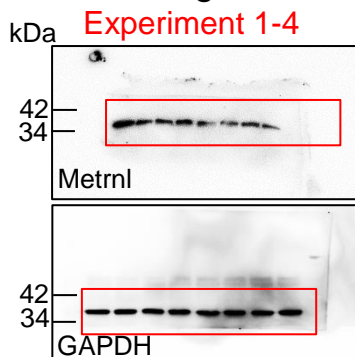**Fig.6C-Upper  
Experiment 3**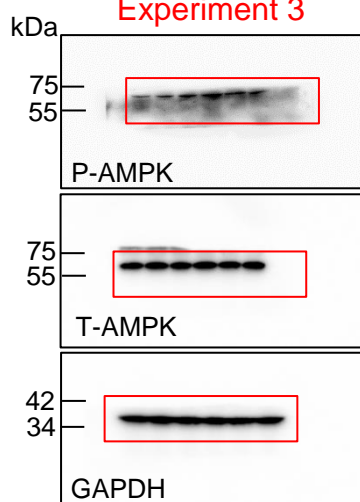**Fig.6C-Lower  
Experiment 1**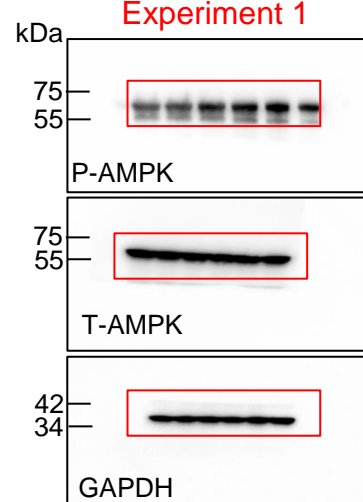**Fig.6C-Upper  
Experiment 1**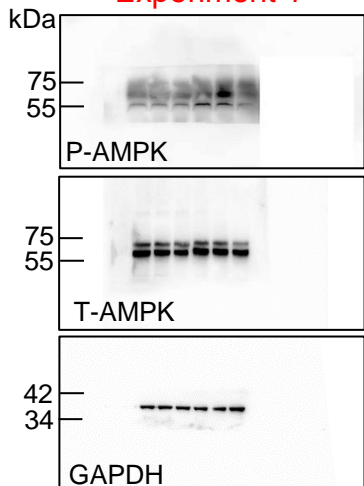**Experiment 4**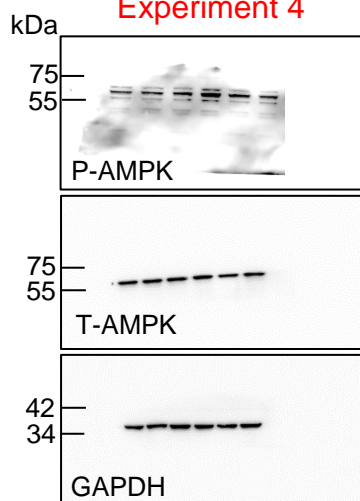**Experiment 2**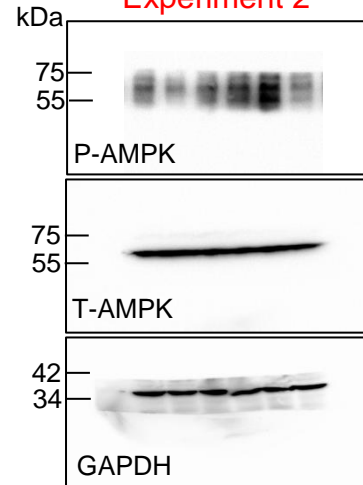**Experiment 2**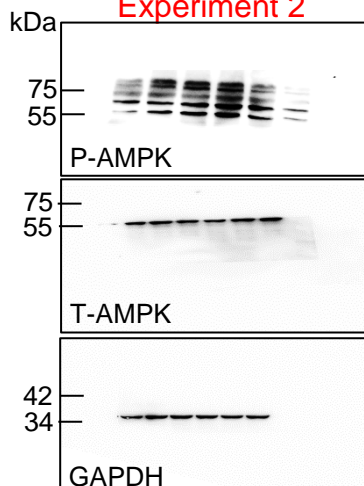**Experiment 3**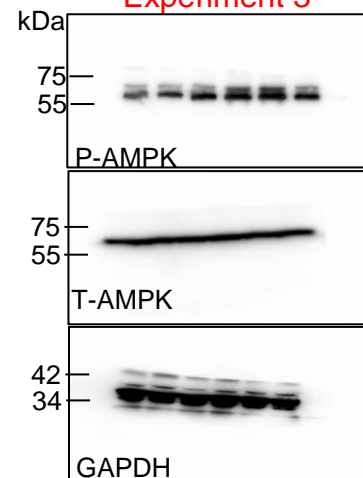

**Fig.6C-Lower**

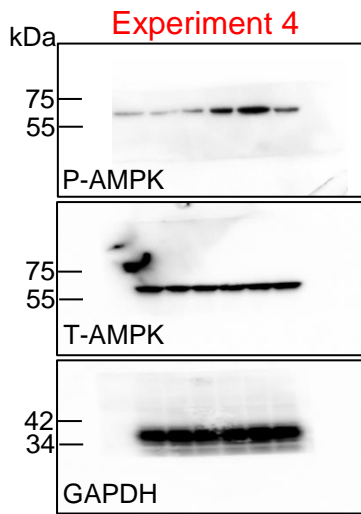

**Fig.6D**

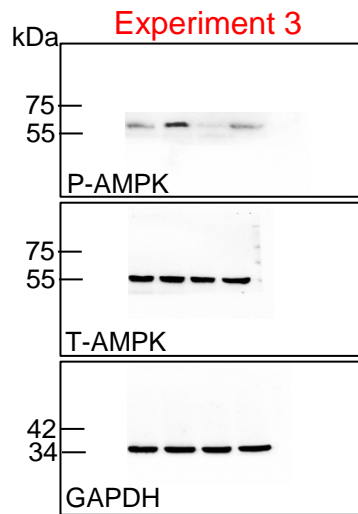

**Fig.6E**

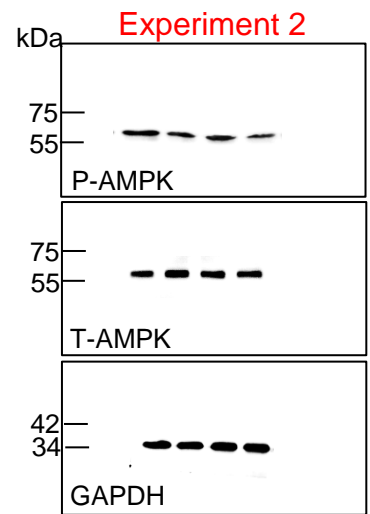

**Fig.6D**

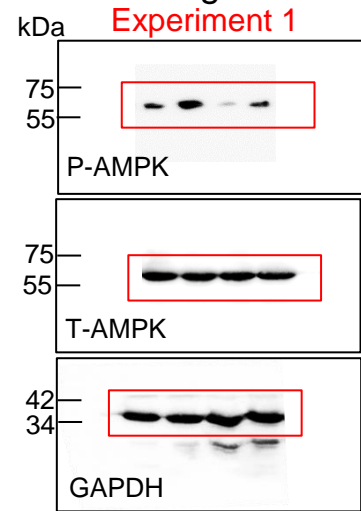

**Experiment 4**

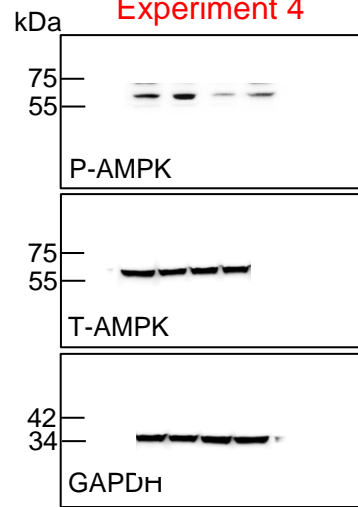

**Experiment 3**

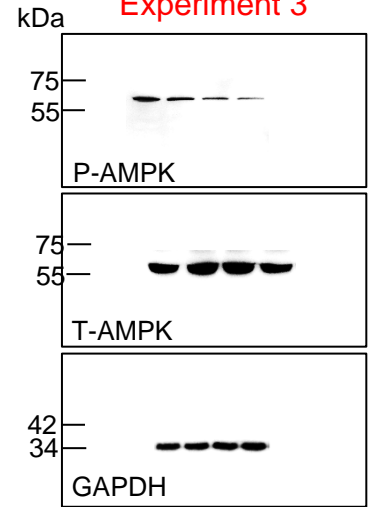

**Fig.6E**

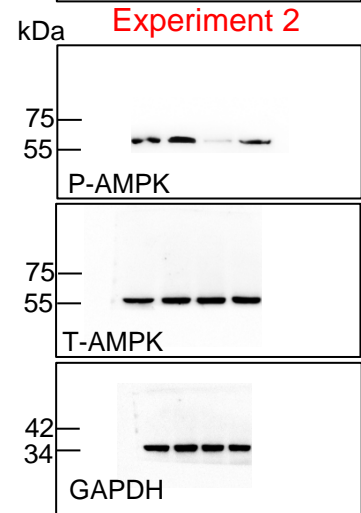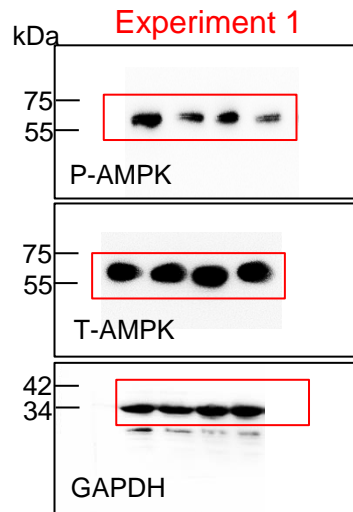

**Experiment 4**

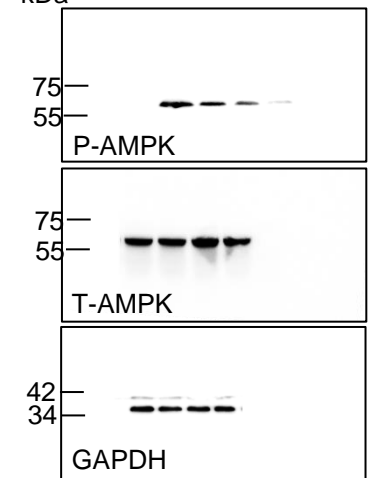

**Fig.6F**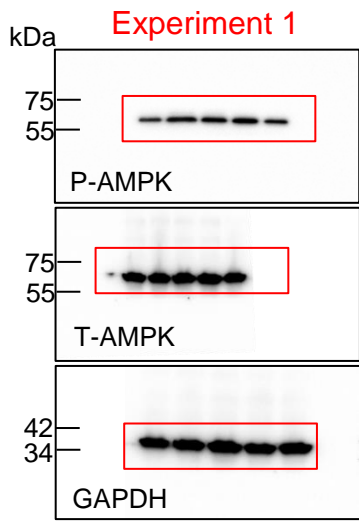**Fig.6F**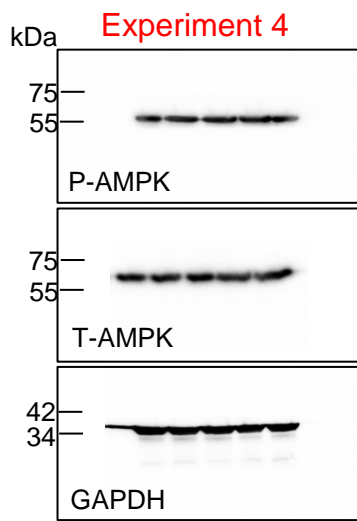**Fig.6G**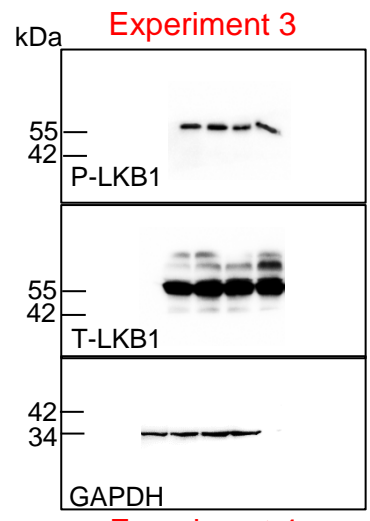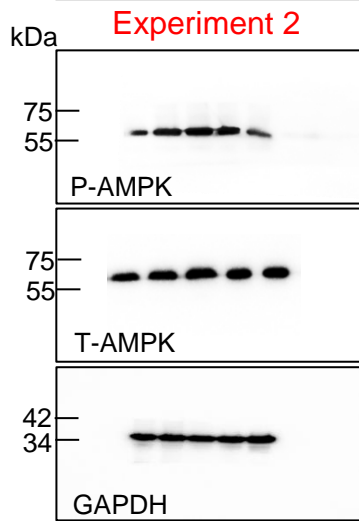**Fig.6G**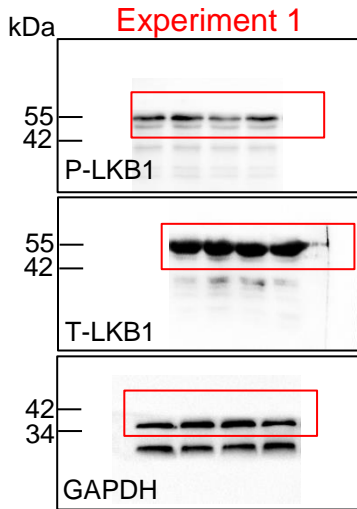**Experiment 4**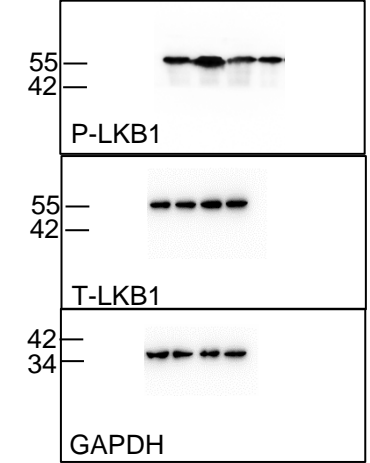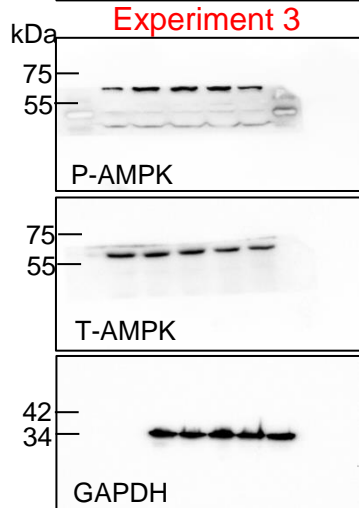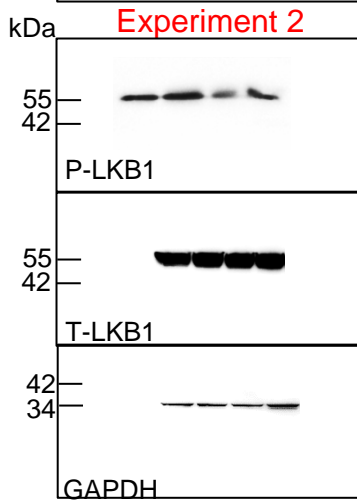

**Fig.6H****Experiment 1**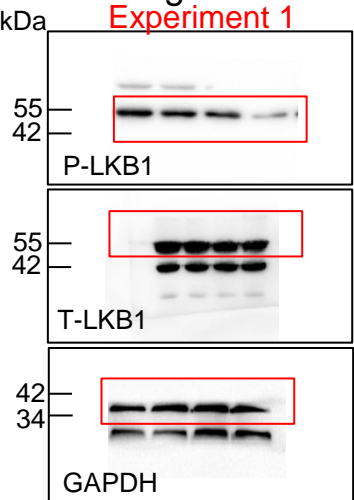**Experiment 2**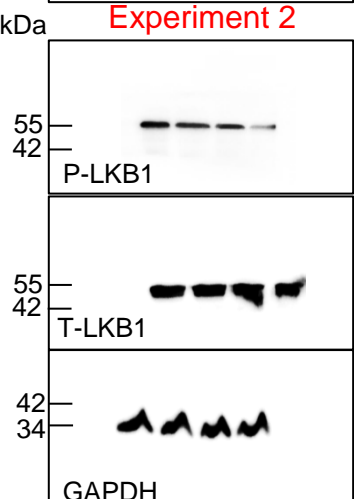**Experiment 3**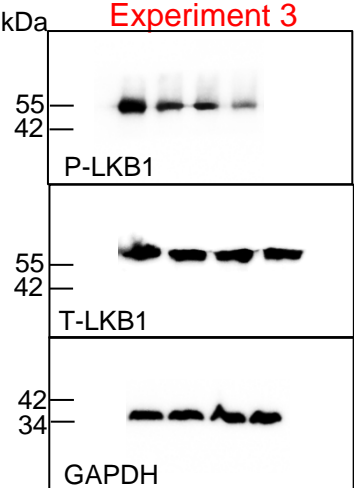**Experiment 4**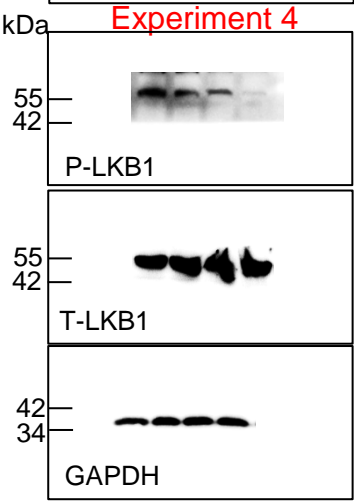**Fig.7A****Experiment 1**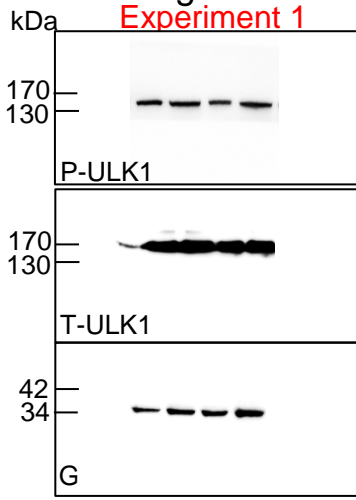**Experiment 2**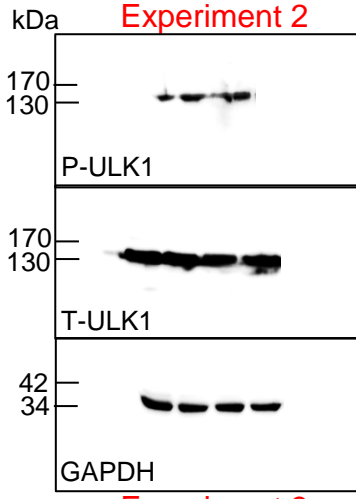**Experiment 3**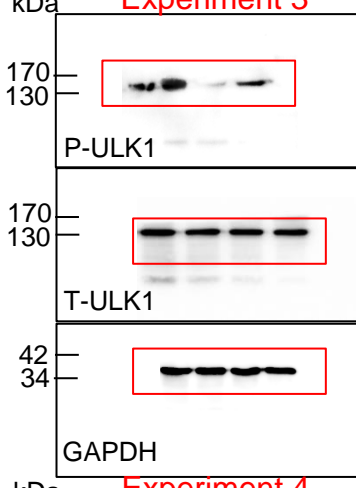**Experiment 4**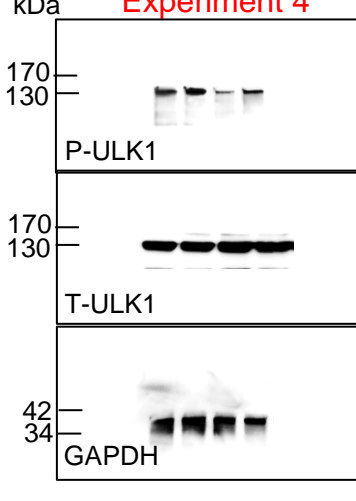**Fig.7B****Experiment 1**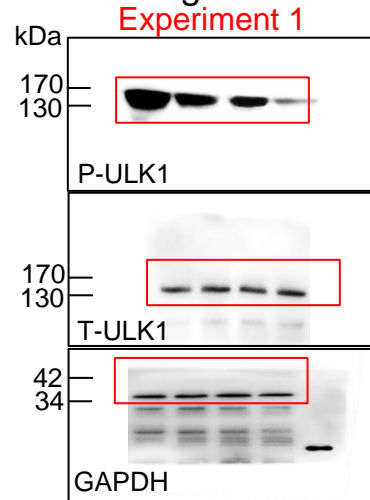**Experiment 2**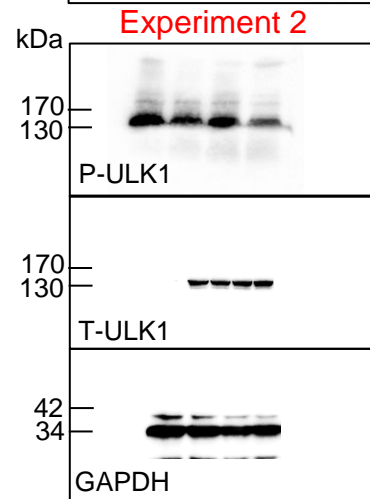**Experiment 3**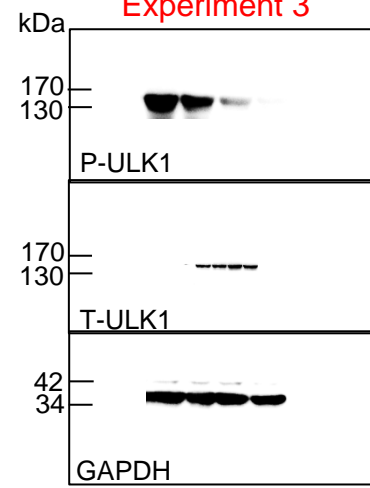**Experiment 4**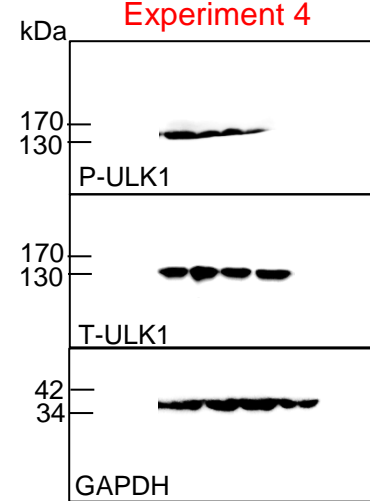

**Fig.7E****Experiment 1**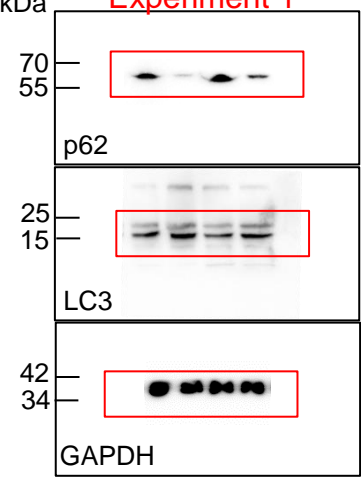**Experiment 2**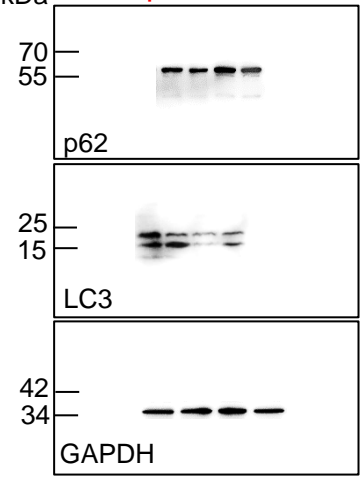**Experiment 3**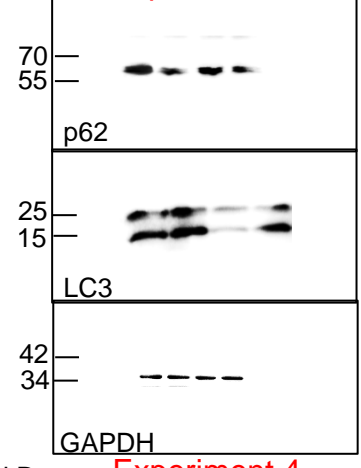**Experiment 4**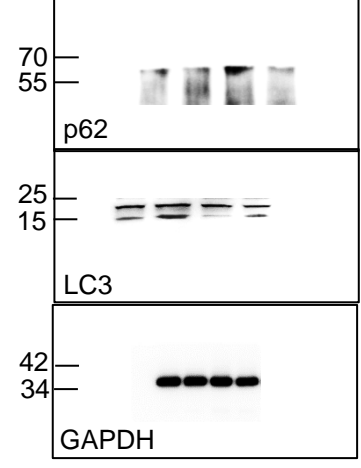**Fig.7G****Experiment 1**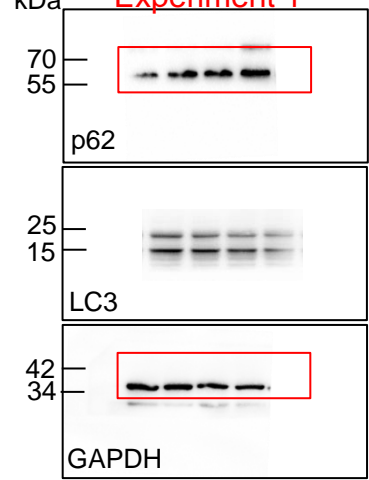**Experiment 2**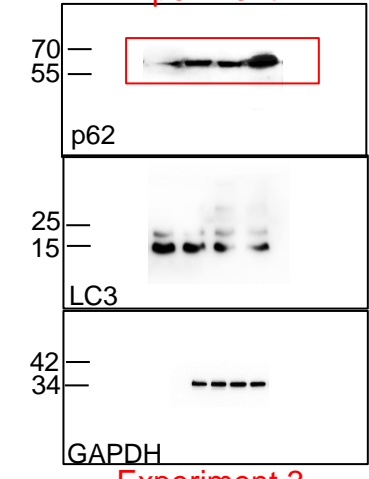**Experiment 3**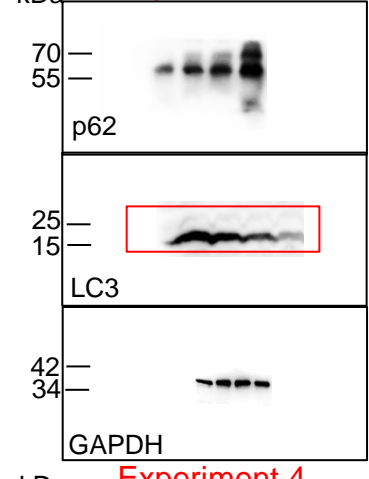**Experiment 4**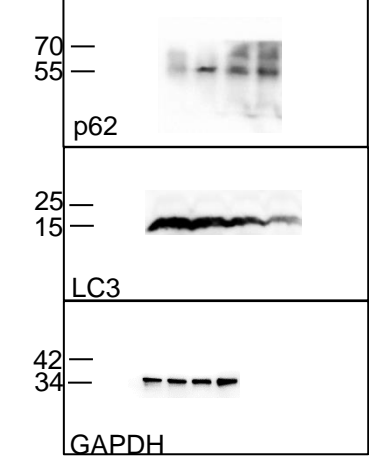**Fig. 8A****Experiment 1**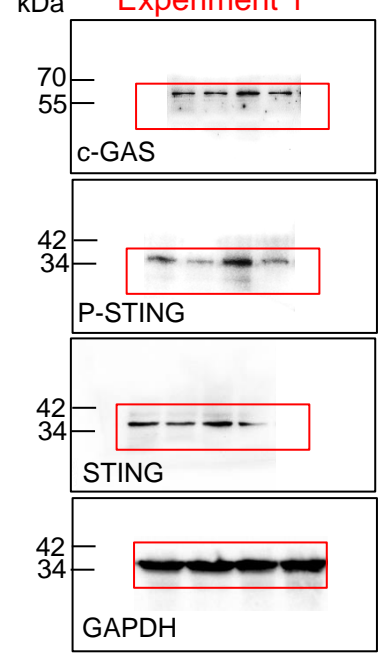**Experiment 2**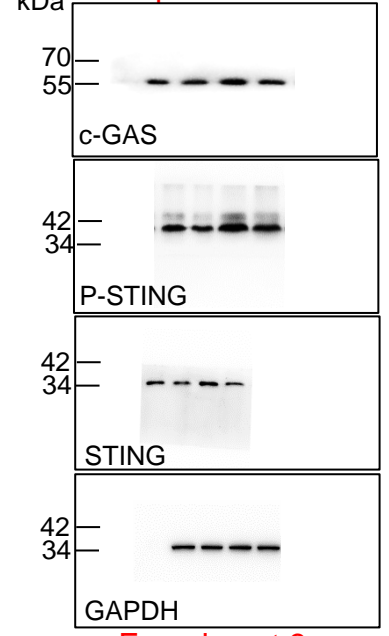**Experiment 3**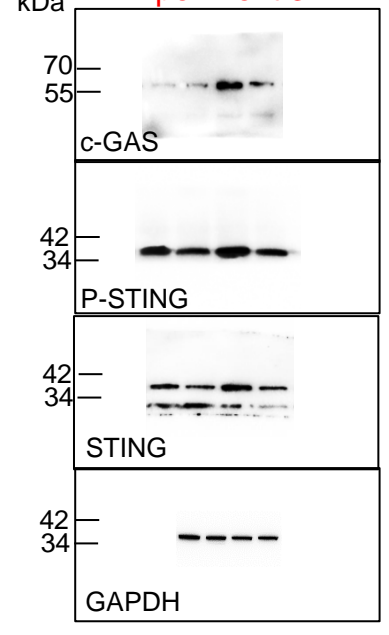

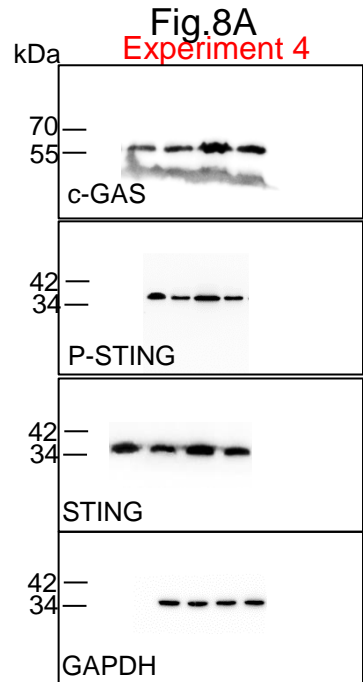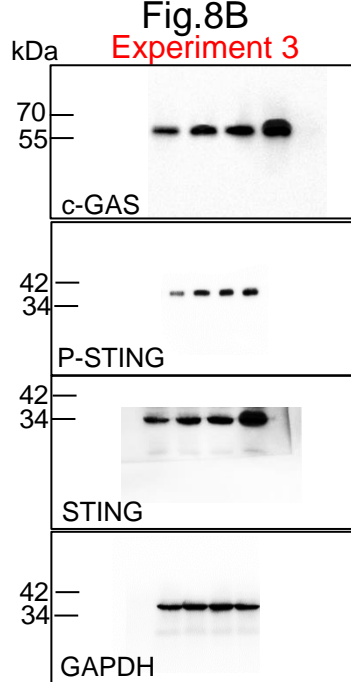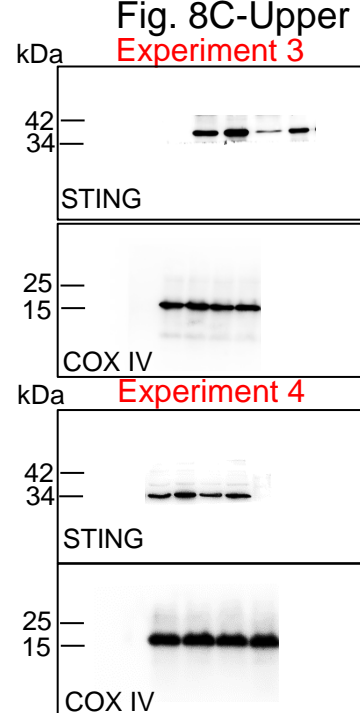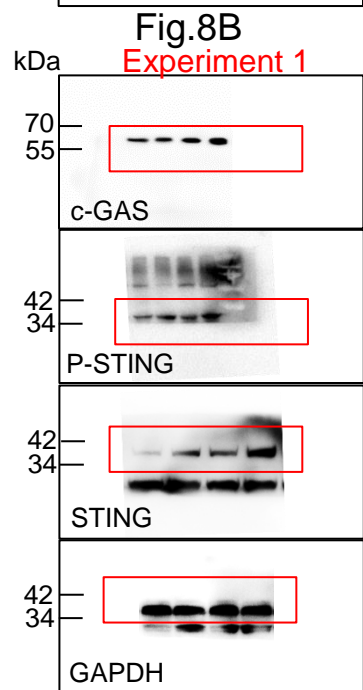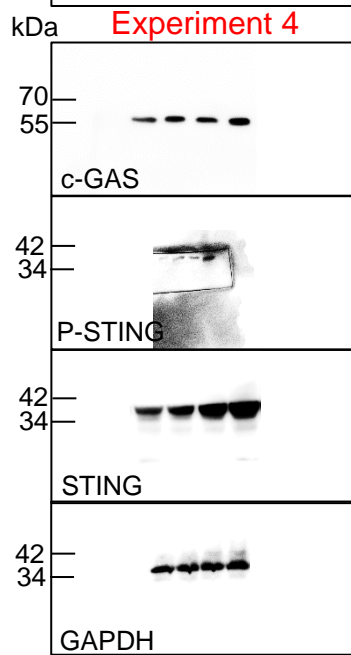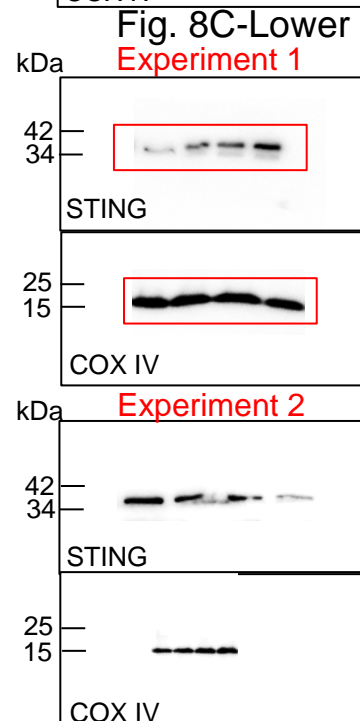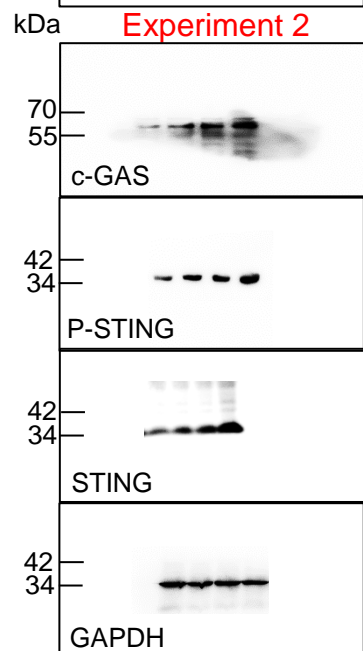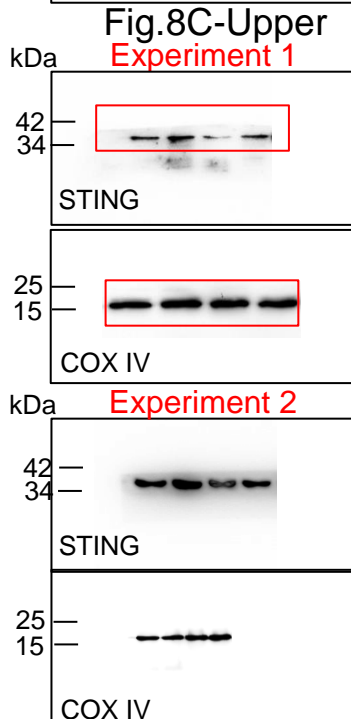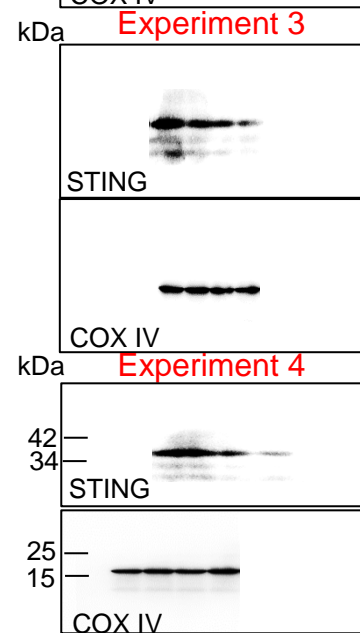

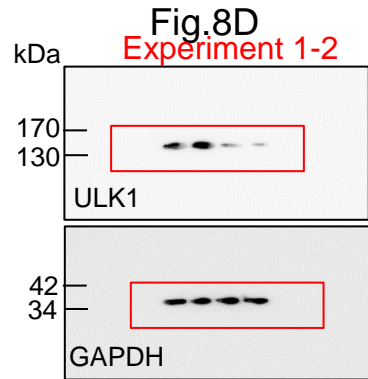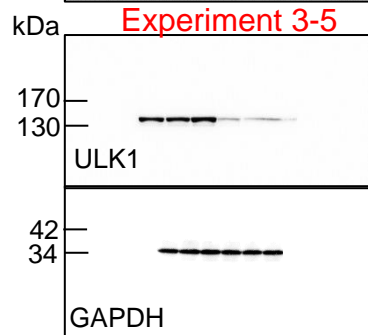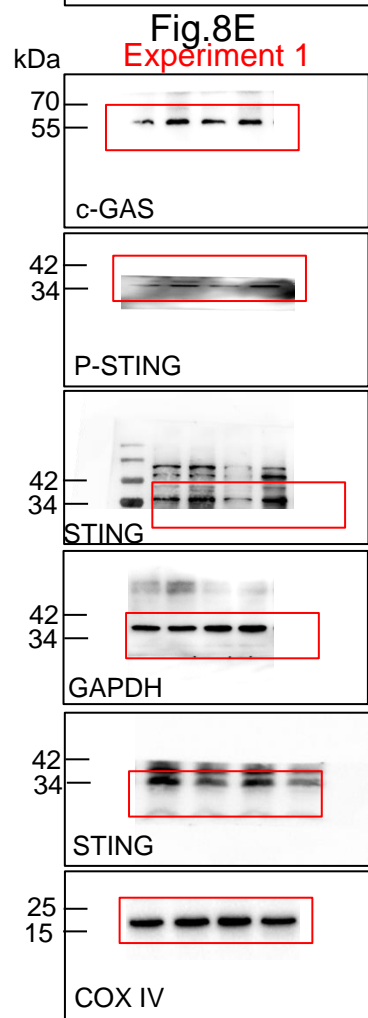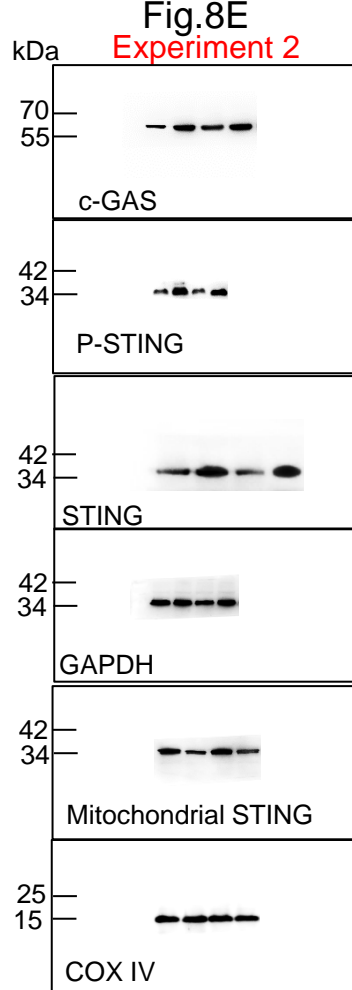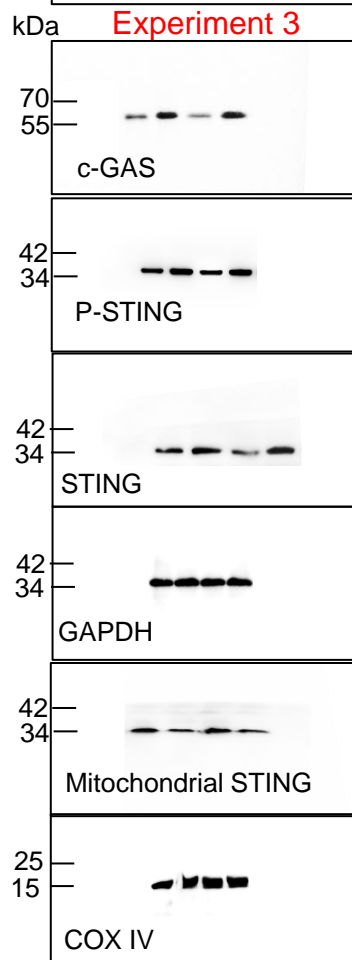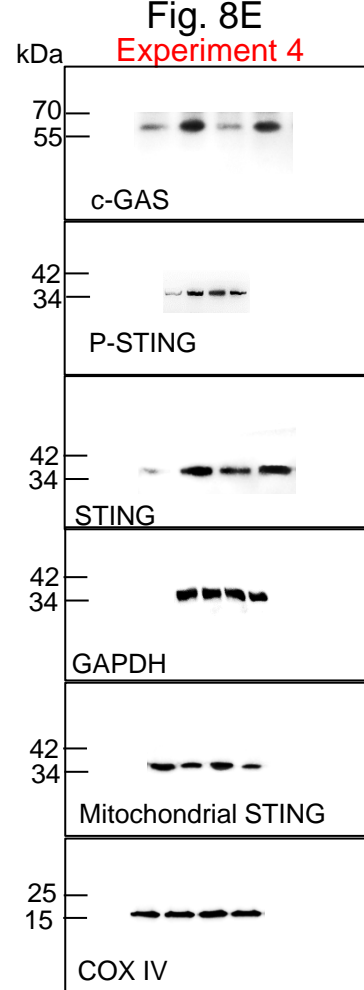

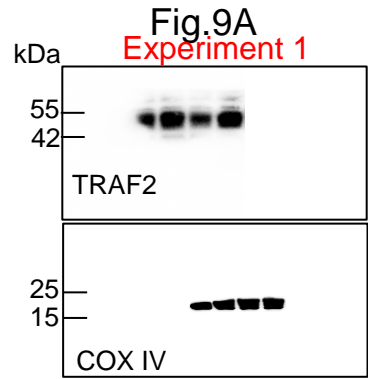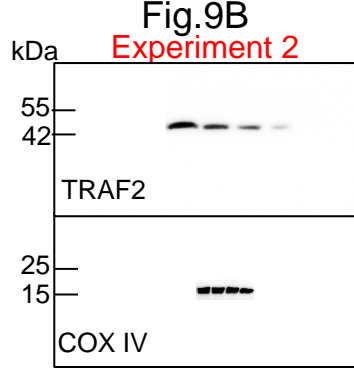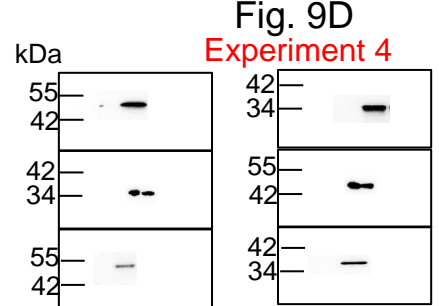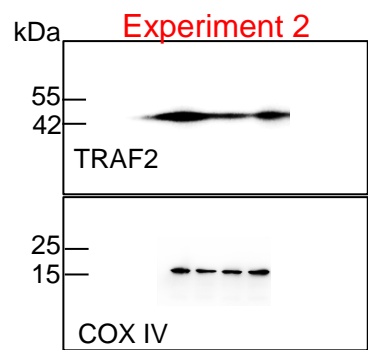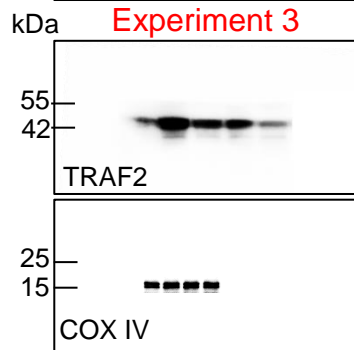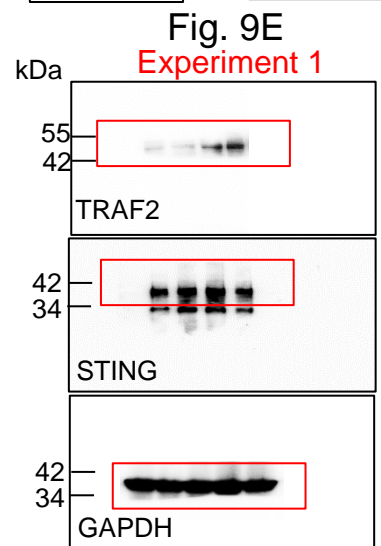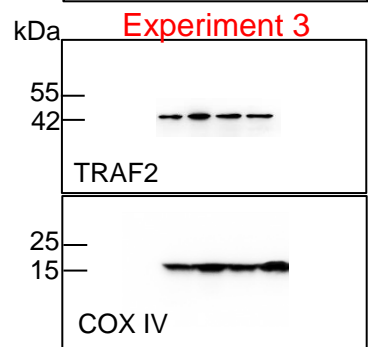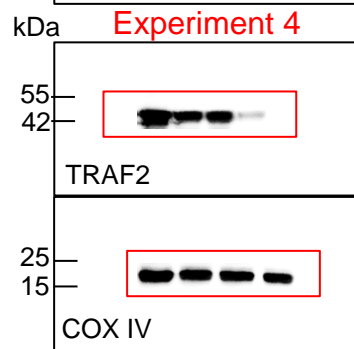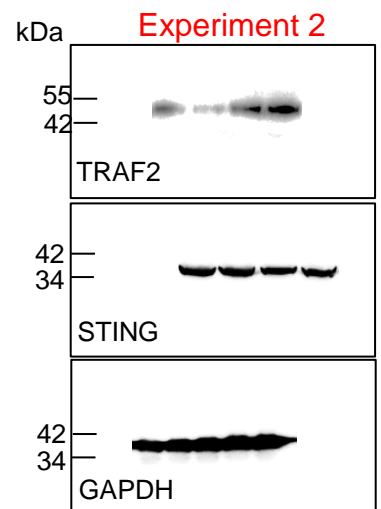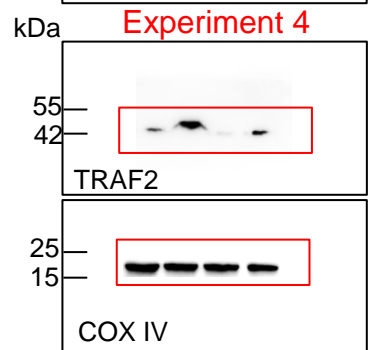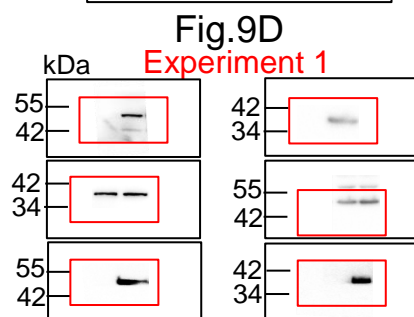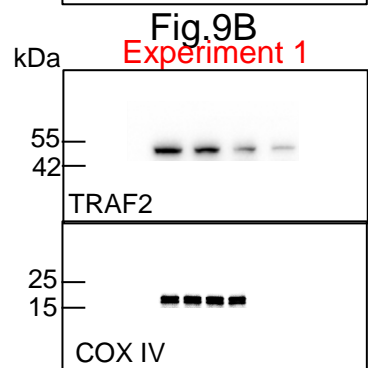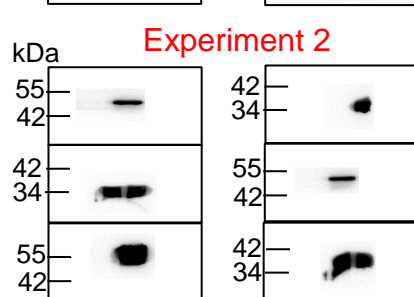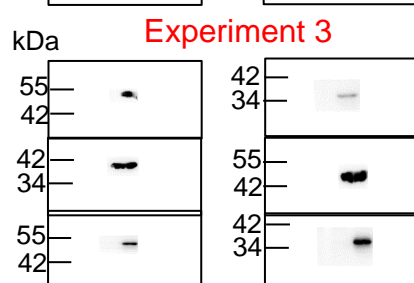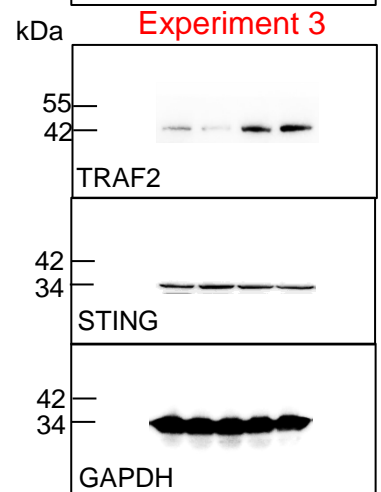





**Fig.9H****Experiment 3**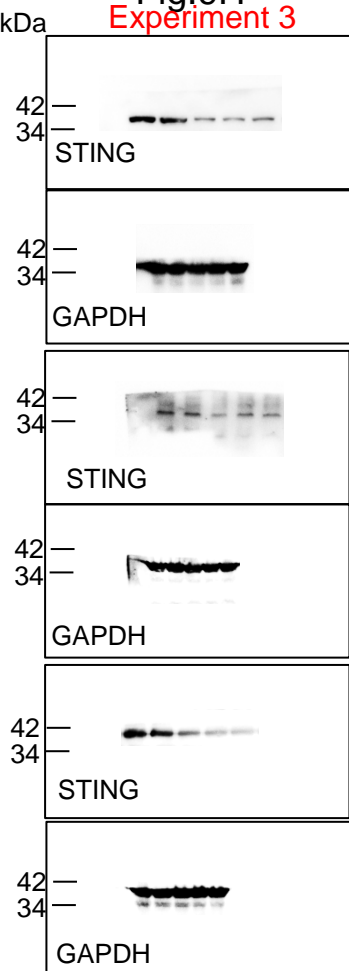**Fig.9I****Experiment 1**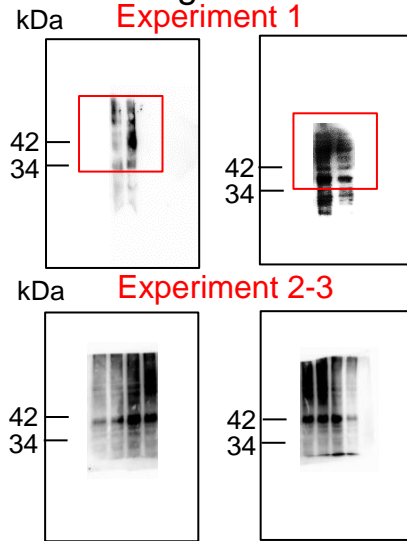**Experiment 2-3**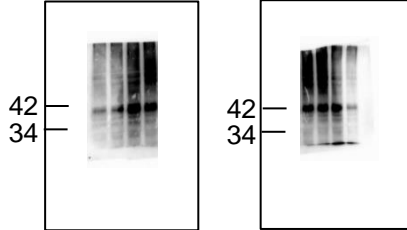**Fig.9J****Experiment 1-3**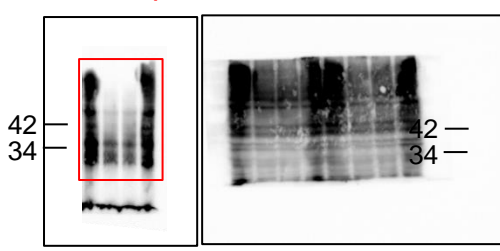**Fig.9K****Experiment 1**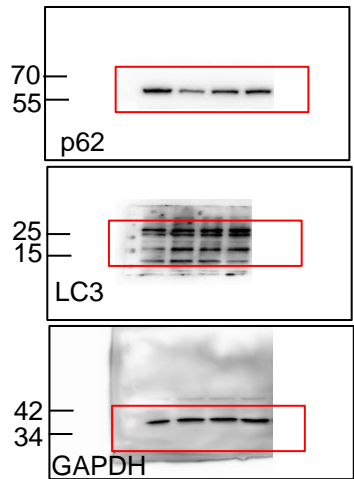**Experiment 2**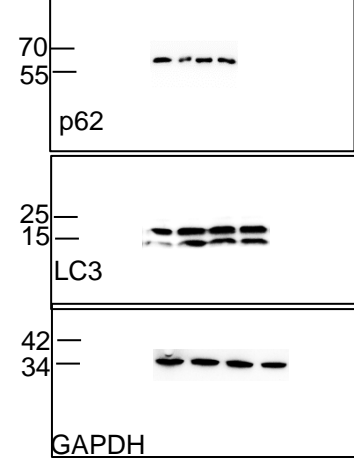**Fig. 9K****Experiment 3**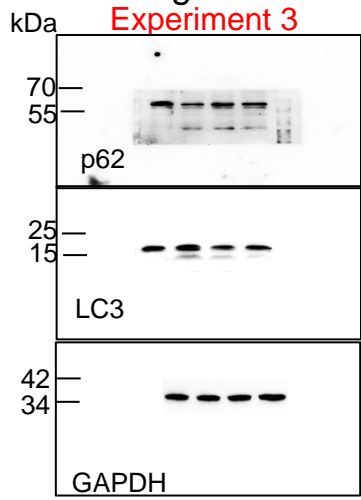**Experiment 4**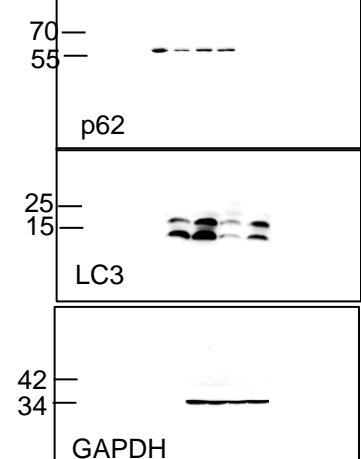**Experiment 4**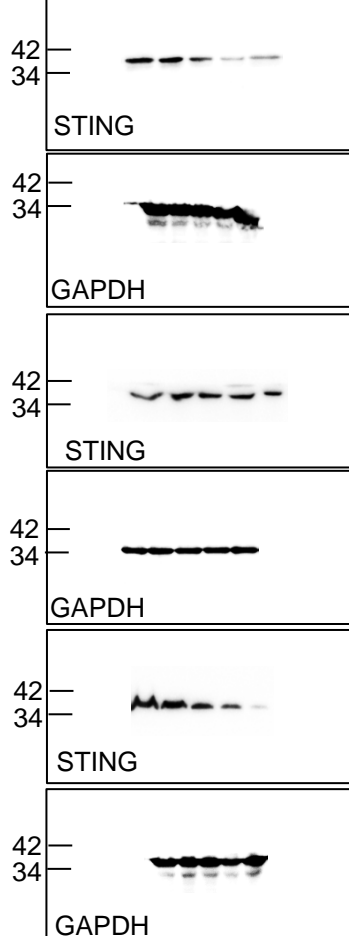

**Fig.S2A****Experiment 1-4**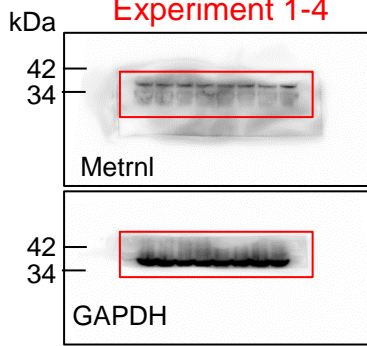**Fig.S7B****Experiment 1-4**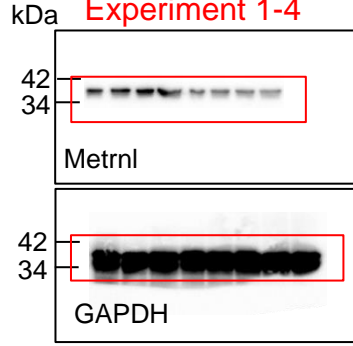**Fig.S10A****Experiment 1-4**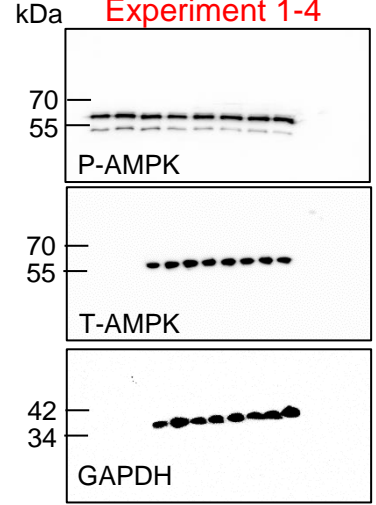**Fig.S3A****Experiment 1-2**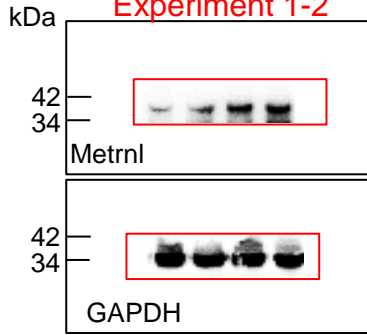**Fig.S8A****Experiment 1-2**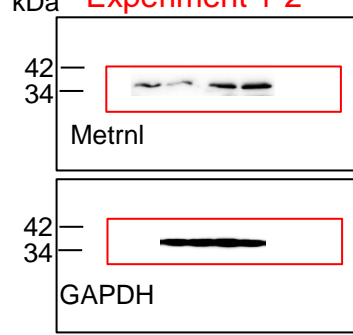**Experiment 3-4**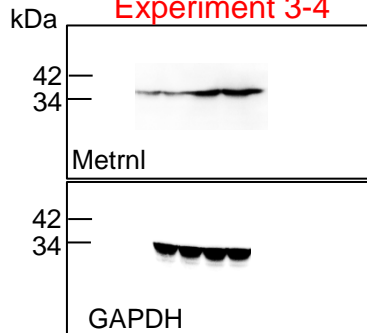**Experiment 3-4**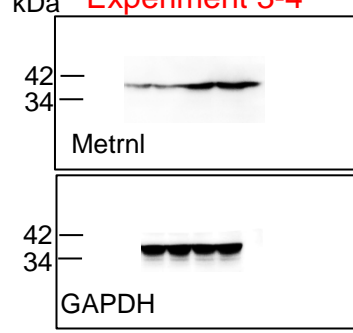**Fig.S3B****Experiment 1-4**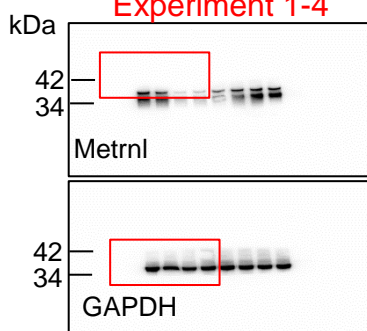**Fig.S8B****Experiment 1-2**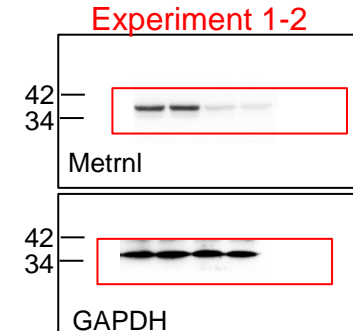**Fig.S6B****Experiment 1-4**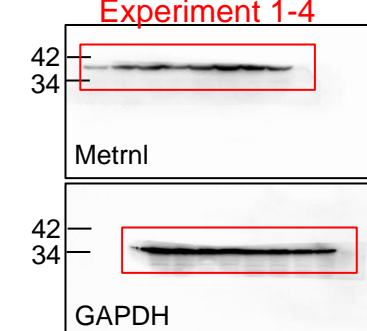**Experiment 3-6**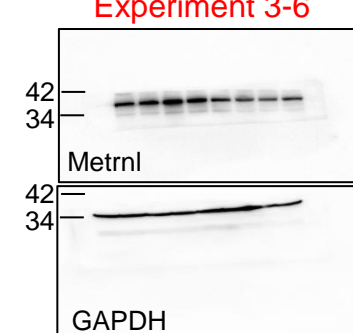

**Fig.S11A**

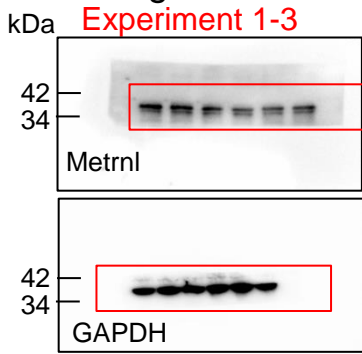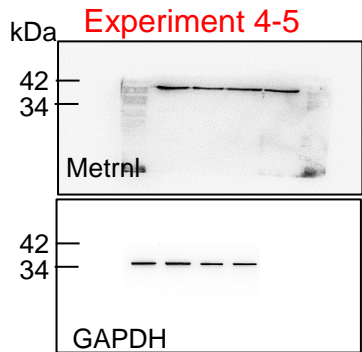

**Fig.S11B**

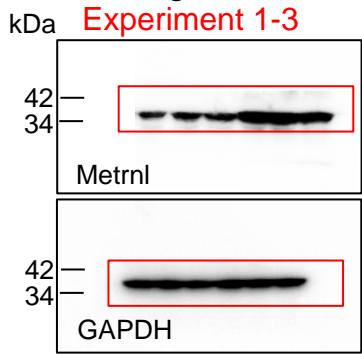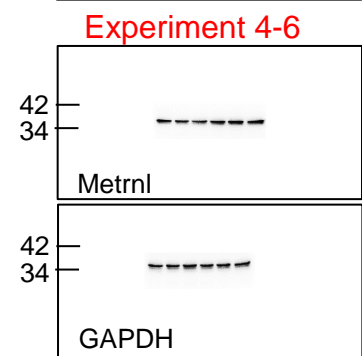

**Fig.S13A**

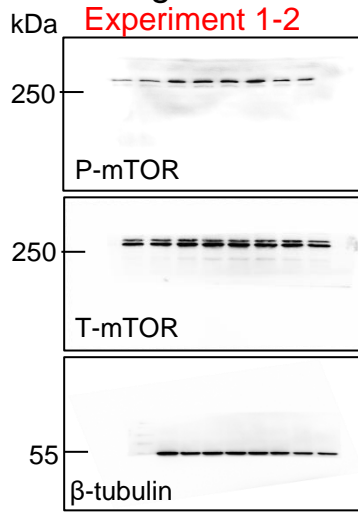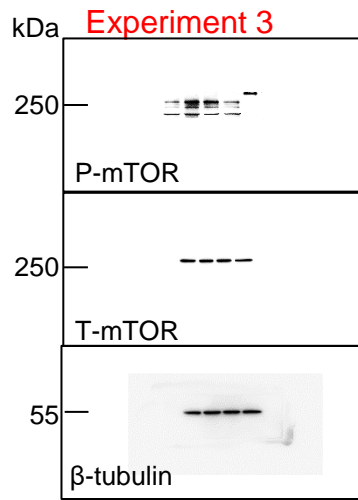

Supplement: mmc2.pdf [file mmc2.pdf]
